# Supplementary material for: SMG1 Acts as a Novel Potential Tumor Suppressor with Epigenetic Inactivation in Acute Myeloid Leukemia
Source: MDPI journal article supplement (doi:10.3390/ijms150917065), 2014-09-25

# Supplementary Information

**Figure S1.** MSP results of the SMG1 methylation status in other 7 normal controls and 43 AML samples. SMG1 was unmethylated in normal controls, but frequently hypermethylated in AML patient samples and cell lines. M, methylated product; U, unmethylated product; N, normal control; L, acute myeloid leukemia.

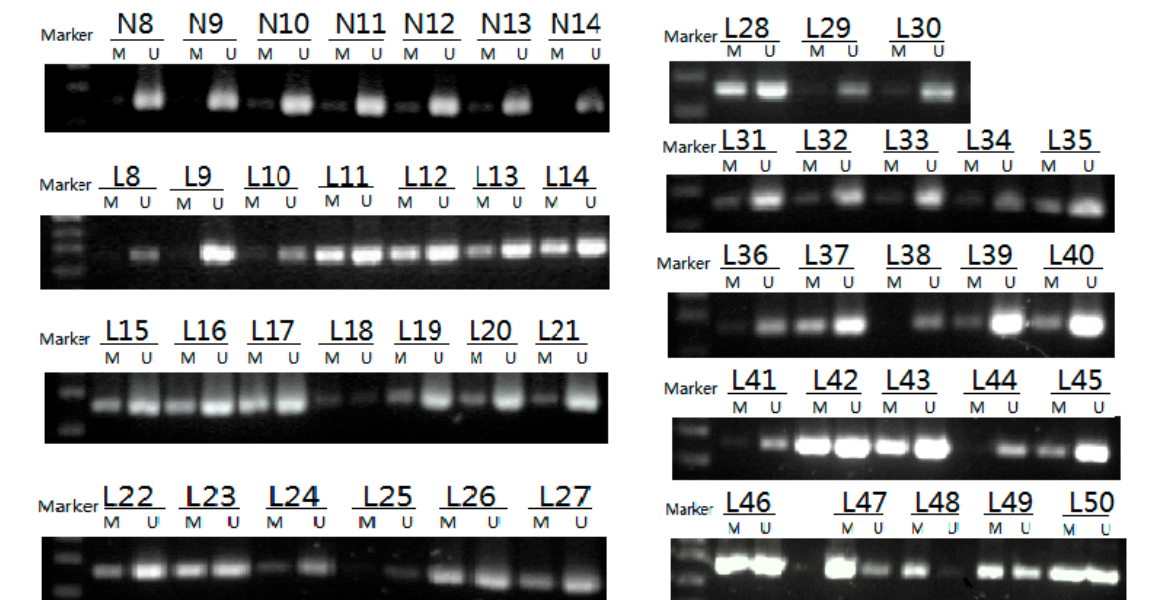

Supplement: s2 [file s2]
